# Supplementary material
Source: publisher site journal article supplement (https://www.dovepress.com/article/438120)
Supplement: Supplementary file 1 [file get_supplementary_file.php]

**Supplementary materials**

**METHODS**

**Sample size calculation and statistical analysis considerations**

There is no study with effects size in NIV during pulmonary rehabilitation for COVID-19 patients. However, in 6MWT, Singh *et al.,* described that a difference of 25 meters is the minimally significant clinical value in COPD [1]. For this variable, then, the sample size calculation used a means gain of 25 meters of standard deviation (SD) for the PR group and means gain of 50 meters and 25 meters of SD for the PR + NIV group, α = 5%, β = 80%, two groups, two measurements (before and after PR) and correction between measurements of 0.5 for ANOVA two-way test (repeated measures, between factors) the sample size value is 40 volunteers. For peak *V̇*O*2* and SF-36 variable, an effect size of 0.27 Cohen's *F* (small to intermediated effect size) is accepted, α = 5%, β = 80%, two groups and two measurements (before and after PR) and correction between measurements of 0.5 in the ANOVA two-way test (repeated measures, between factors) the sample size value is 84 volunteers. Also, accepting a sample loss of 20%, the total sample size is 100 participants (50 participants each group). GPower 3.1.2 (University of Dusseldorf, Dusseldorf, Germany) was used for the calculations.

**Collaborating group**

The study is a collaboration between the Universidade Federal do Amazonas (UFAM) and the Fundação de Medicina Tropical Dr Heitor Vieira Dourado (FMT-HVD), the Universidade do Estado do Amazonas (UEA), the Instituto Leonidas e Maria Deane (ILMD/ FIOCRUZ-AM) and sponsored by the Fundação de Amparo à Pesquisa do Estado do Amazonas (FAPEAM).

**Guidelines**

The study follows the Standard Protocols Items: Recommendations for Interventional Trials (SPIRITS) [2] and nonpharmacologic Consolidated Standards of Reporting Trials (CONSORT) [3]. All procedures will be carried out following good clinical and laboratory practices and in accordance with the Declaration of Helsinki and the International Harmonization Committee. Furthermore, this trial is registered at Brazilian clinical trials register (RBR-3t9pkzt).

**Data management**

All data and information requested in the clinical record will be collected from the electronic patient record or in interviews with the patient or their caregiver, including vital and clinical signs, concomitant diseases, and any possible concomitant medications. Demographic data will be recorded in the center's file or in the patient's medical file, along with documentation pertaining to the eligibility criteria. Clinical information and laboratory test results will be entered by the team on tablets and laptops, which will have an online connection with REDCap, where the information will be stored in real time, using the server of Fundação de Medicina Tropical Dr Heitor Vieira Dourado. Also, to protect the data, the information will later be downloaded to a hard drive and erased in the cloud.

**Clinical evaluation**

Baseline assessments include a clinical interview for past and present medical history, including comorbidities, medications, blood pressure, heart rate, respiratory rate, body composition and SpO2. Dyspnea will be evaluated using the modified Medical Research Council (mMRC) scale, as described by Kovelis and collaborators[4]. Briefly, volunteers report the degree of dyspnea choosing a value between 0 and IV.

**Short form – 36**

To assess quality of life (QoL), the short form (SF) 36 will be used before and 8 week after treatment, validated Portuguese version. The SF - 36 is divided into 8 scales with representative items: Functional capacity (10 items), physical aspects (4 items), pain (2 items), general health (5 items), vitality (4 items), social aspects (2 items), emotional aspects (3 items) and mental health (5 items). The calculation of the score will follow [5].

**Spirometry**

Spirometry will be performed using the Spirobank II (Medical International Research, Roma, Italy) portable device according to the criteria of the American Thoracic Society (ATS) [6], with determination of forced expiratory volume in one second (FEV1), forced vital capacity (FVC), FEV1/FVC ratio and maximum voluntary ventilation (MVV). During the tests, specific antibacterial/antiviral disposable filters will be used to prevent contamination of the device and participants. Pulmonary function will also be reassessed after completion of PR. Pulmonary function will also be reassessed after completion of PR.

**Respiratory muscle strength**

Manovacuometry will be assessed through the digital device MVD 300-U (HOMED, Porto Alegre, Brazil) in order to obtain the maximum inspiratory pressure (MIP) and maximum expiratory pressures (MEP), following ATS/European Respiratory Society (ERS) [7] recommendations and reference values for the Brazilian population [8].

**Cardiac function assessment**

Cardiac function will be performed by two-dimensional transthoracic echocardiography complemented with M-mode, pulsed tissue, and color doppler GE Vivid E95 (General Eletrics Vingmed Ultrasound, Horten, Norway) according to the recommendations of the American Society of Echocardiography [9]. Measurements of the cardiac chambers and assessment of ventricular systolic and diastolic functions will be performed. The left ventricular diastolic diameter (LVDD), right ventricular diastolic diameter (DVD) and left atrial volume indexed by body surface (LAiBF) will be measured. Ventricular systolic function will be assessed by the left ventricular ejection fraction by Simpson's method (LVEF), the systolic velocity of the lateral mitral annulus (lateral S’) and the systolic velocity of the tricuspid annulus (S’ tricuspid). Left ventricular diastolic function will be assessed by the relationship between the E wave of the mitral flow with the E wave of the mitral annulus on tissue doppler (E/E' ratio) and by the diastolic velocity of the lateral mitral annulus (lateral E’).

**Cardiopulmonary exercise test (CPET)**

The participant will be continuously monitored by a 12-lead electrocardiogram (ECG) during the test by WinCardio (Micromed, Brazil). Blood pressure (BP) will also be recorded before testing, every three minutes during exercise and during the recovery period. The Borg CR10 will also be used to assess lower limb muscle fatigue and shortness of breath during the test [10]. The test will be interrupted if patients present physical exhaustion and/or present one or more of the following criteria: (I) maximum fatigue/leg or dyspnea; (II) angina or electrocardiographic evidence of ischemia or malignant arrhythmia (ventricular tachyarrhythmia, bigeminism, and [atrioventricular and branch] blocks); (III) pressure changes with an increase greater than 220 mmHg in SBP and above 100 mmHg in DBP; (IV) if SpO2 drops ≤ 88%; (V) patient requesting interruption of the test. Subjects will be encouraged to achieve symptom-limited maximum capacity, characterized by a respiratory exchange ratio (RER) of *V̇*CO2/*V̇*O2 ≥ 1.1.

Assessments will be performed before and up to one week after training. The volunteer will use a mask system in which there is a bidirectional digital volume transducer, very light and accurate, capable of measuring lung volumes. Subjects will be familiarized with the treadmill and the Borg CR10 scale. Volunteers will be encouraged to perform the test until exhaustion. The test will be performed together with a professional cardiologist, so that it is possible to detect any cardiac arrhythmias as well as assistance in the event of any complications and a trained physiotherapist. Testing will be performed following recommendations of the American Heart Association [11–13].

**Muscle oxygenation during exercise**

Will be put one probe on the lateral face of the left thigh (vastus lateralis) and one on the left external intercostal muscle. Before each test, the NIRS probes will be calibrated according to the manufacturer's instructions. All signals will be recorded at 1000 Hz and stored for later analysis. The sum of HbO2 and HHb will be used to calculate HbT, which is considered an index of local blood flow in the muscle [14]. The difference between HbO2 and HHb (Hbdiff) will be used as an index of tissue oxygen extraction. Muscle saturation will also be evaluated through the tissue saturation index (TSI) variable. The delta values of these NIRS variables will be calculated as: the highest peak value reached at each exercise intensity minus the value obtained at baseline before the start of exercise. The baseline will be the average of the 20s of the most stable rest periods. The last 10s will not be used to calculate the baseline value because anticipatory cardiovascular responses can change these values.

**Flow-mediated dilation**

The endothelial function will be assessed through FMD method in the brachial artery, before and after exercise training. A brachial artery ultrasonography (GE Vivid E95, General Eletrics Vingmed Ultrasound, Horten, Norway) will be performed at a proximal site to the antecubital fossa 1-3 cm, with the arm abducted approximately 80° from the body and the forearm supinated. The ultrasound probe (11 MHz) will be positioned to visualize the lumen - anterior and posterior intima interfaces when measuring the diameter or velocity of the central flow (pulsed Doppler) [15]. After the initial images are recorded, a forearm blood pressure cuff will be inflated to 200 mmHg for 5 min. To assess FMD, 10 images will be captured at a rate of 10 images per second for 3min after cuff release [16]. Basal brachial flow velocity and peak velocity after cuff release will be recorded. The images will be digitally recorded Brachial Imager software (Medical Imaging, Idaho, USA) and later analyzed. The variables to be analyzed will be the absolute FMD (mm), which will be calculated as: (diameter of the brachial artery before insufflation - diameter of the brachial artery after insufflation); the percentage of FMD (%), which will be calculated as: [(brachial artery diameter before insufflation - brachial arterial diameter after insufflation/ blood vessel diameter before insufflation)*100] [16]. To estimate the shear stress (CE) on the brachial artery wall, peak EC rates (s-1) will be calculated during FMD using the following equation: peak EC = maximum flow velocity (mm*s-1)/diameter arterial (mm). To calculate the normalized FMD, the following equation will be used: Normalized FMD = FMD/peak E [17].

**Cardiac autonomic behavior**

The cardiac autonomic behavior will be evaluated through the analysis of HRV in different postures and in the respiratory sinus arrhythmia maneuver (M-RSA). The HRV will be calculated using linear mathematical and statistical models at the time of greater signal stability of at least 256 R intervals (RRi) for 10 minutes in the supine, standing, sitting and M-RSA postures during the 4 minutes of the maneuver. All artifacts will be removed through visual inspection, by the following parameters: All ectopic beats or signal artifacts will be analyzed and values that differ ± 20 bpm from the mean will be manually excluded, and the analyzed segment must have more than 90% of the pure sinus beats [18–20]. The RRi data will be captured by a HR monitor Polar United (Polar, Kemple, Finland) associated with a HR recording strap Polar H10 (Polar, Kemple, Finland) (details in the supplementary material).

The parameters analyzed will be time domain, frequency domain and nonlinear domain, calculated by Kubios 3.0 software (University of Kuopio, Kuopio, Finland). For time domain analysis, the following variables will be used: Mean RRi and standard deviation of all normal RRi, in ms (SDNN), which are estimative indices of sympathetic and parasympathetic behavior; and the square root of the mean square of the differences between successive RRi minus 1, in ms (*r*MSSD), which is representative of parasympathetic behavior [43]. For frequency domain analysis, the power spectrum components will be decomposed using autoregressive analysis through the following variables: low frequency components (BF), in absolute and normalized units (BF and BFnu, respectively), which comprises the spectrum from 0.04 to 0.15 Hz, and representative of the sympathetic behavior (BF and BFun) and with some contribution of the parasympathetic behavior (BF); high frequency components (AF), in absolute and normalized units (AF and AFnu, respectively), which comprises the spectrum from 0.15 to 0.40 Hz, and representative of the parasympathetic behavior and influenced by respiratory modulation; and the BF/AF ratio, representative of the sympathetic and parasympathetic behavior [44]. For the analysis of the nonlinear domain, the RRi will be analyzed using the Poincaré calculation and describing the following variables: Standard deviation perpendicular to the RRi identity line (SD1), which is representative of the parasympathetic behavior and standard deviation along the line of RRi identity (SD2), which is representative of the total HRV, and the HR complexity variables through ApEn, Sample Entropy, α1 and α2 [44]. Assessments will be performed before and up to one week after training.

**Inflammatory profile**

Serum cytokine concentrations will be measured using a CBA flex cytometer for IL-1β, IL-6, IL-10 and TNFα (BD Bioscience, San Jose, Ca, USA) according to the manufacturer's instructions. A FACSCalibur flow cytometer (BD Bioscience, San Jose, Ca, USA) will be used to read the samples. Concentrations (pg*mL-1) and mean fluorescence intensities of each cytokine will be calculated using BD FACAP Array v1.0.1 software (BD Bioscience, San Jose, CA, USA).

**Missing data**

For this study, it is expected that most missing data will be considered missing at random - MAR thus, related to the intervention and not the outcome. If missing data is classified as missing completely at random – MCAR, thus related to the intervention and not the outcome. If missing data are classified as non- missing not at random - MNAR, they will be analyzed by the maximum likelihood method. Due to the design of this study, a low follow-up loss is expected, however, a 20% dropout rate was estimated for the sample size calculation. To deal with missing data, all dropouts will be monitored throughout the study. A committee to deal with the missing data will be created to identify the type, pattern, and reason why it occurred. To this end, the research team will request permission to contact participants after they withdraw from the study.

**Harms**

All events must be controlled and reported in compliance with all applicable regulations and included in the final clinical trial report. All physical/clinical symptoms described at each visit will be recorded as an adverse event if they occur or worsen during the study and, when considered to be related to the study protocol. All will be reported to the Human Research Ethics Committee from Universidade Federal do Amazonas, Manaus, Amazonas, Brazil.

**Auditing**

An independent researcher will monitor the progress of the study every 6 months, and audit the quality and completeness of the data, and verify if all procedures are in accordance with the protocol.

**REFERENCES**

[1] Singh SJ, Puhan MA, Andrianopoulos V, Hernandes NA, Mitchell KE, Hill CJ, et al. An official systematic review of the European Respiratory Society/American Thoracic Society: measurement properties of field walking tests in chronic respiratory disease. European Respiratory Journal 2014;44:1447–78. https://doi.org/10.1183/09031936.00150414.

[2] Chan A-W, Tetzlaff JM, Altman DG, Laupacis A, Gøtzsche PC, Krleža-Jerić K, et al. SPIRIT 2013 Statement: Defining Standard Protocol Items for Clinical Trials. Ann Intern Med 2013;158:200. https://doi.org/10.7326/0003-4819-158-3-201302050-00583.

[3] Boutron I, Altman DG, Moher D, Schulz KF, Ravaud P. CONSORT Statement for Randomized Trials of Nonpharmacologic Treatments: A 2017 Update and a CONSORT Extension for Nonpharmacologic Trial Abstracts. Ann Intern Med 2017;167:40. https://doi.org/10.7326/M17-0046.

[4] Kovelis D, Segretti NO, Probst VS, Lareau SC, Brunetto AF, Pitta F. Validação do Modified Pulmonary Functional Status and Dyspnea Questionnaire e da escala do Medical Research Council para o uso em pacientes com doença pulmonar obstrutiva crônica no Brasil. Jornal Brasileiro de Pneumologia 2008;34:1008–18. https://doi.org/10.1590/S1806-37132008001200005.

[5] Campolina AG, Ciconelli RM. [SF-36 and the development of new assessment tools for quality of life]. Acta Reumatol Port 2008;33:127–33.

[6] Miller MR. Standardisation of spirometry. European Respiratory Journal 2005;26:319–38. https://doi.org/10.1183/09031936.05.00034805.

[7] Laveneziana P, Albuquerque A, Aliverti A, Babb T, Barreiro E, Dres M, et al. ERS statement on respiratory muscle testing at rest and during exercise. European Respiratory Journal 2019;53:1801214. https://doi.org/10.1183/13993003.01214-2018.

[8] Pereira CA de C, Sato T, Rodrigues SC. Novos valores de referência para espirometria forçada em brasileiros adultos de raça branca. Jornal Brasileiro de Pneumologia 2007;33:397–406. https://doi.org/10.1590/S1806-37132007000400008.

[9] Lang RM, Bierig M, Devereux RB, Flachskampf FA, Foster E, Pellikka PA, et al. Recommendations for Chamber Quantification: A Report from the American Society of Echocardiography’s Guidelines and Standards Committee and the Chamber Quantification Writing Group, Developed in Conjunction with the European Association of Echocardiography, a Branch of the European Society of Cardiology. Journal of the American Society of Echocardiography 2005;18:1440–63. https://doi.org/10.1016/j.echo.2005.10.005.

[10] Borg GA. Psychophysical bases of perceived exertion. Med Sci Sports Exerc 1982;14:377–81.

[11] Guazzi M, Arena R, Halle M, Piepoli MF, Myers J, Lavie CJ. 2016 Focused Update: Clinical Recommendations for Cardiopulmonary Exercise Testing Data Assessment in Specific Patient Populations. Circulation 2016;133. https://doi.org/10.1161/CIR.0000000000000406.

[12] Arena R, Guazzi M, Cahalin LP, Myers J. Revisiting Cardiopulmonary Exercise Testing Applications in Heart Failure. Exerc Sport Sci Rev 2014;42:153–60. https://doi.org/10.1249/JES.0000000000000022.

[13] Myers J, Arena R, Cahalin LP, Labate V, Guazzi M. Cardiopulmonary Exercise Testing in Heart Failure. Curr Probl Cardiol 2015;40:322–72. https://doi.org/10.1016/j.cpcardiol.2015.01.009.

[14] de Almeida A, Jorge E Béjar S, Erin Calaine I, Danilo I, Juan M M. The effect of the fraction of inspired oxygen on the NIRS-derived deoxygenated hemoglobin “breakpoint” during ramp-incremental test. Am J Physiol Regul Integr Comp Physiol 2019;8:55.

[15] Anderson TJ, Phillips SA. Assessment and prognosis of peripheral artery measures of vascular function. Prog Cardiovasc Dis 2015;57:497–509. https://doi.org/10.1016/j.pcad.2014.11.005.

[16] Franklin NC, Ali M, Goslawski M, Wang E, Phillips SA. Reduced vasodilator function following acute resistance exercise in obese women. Front Physiol 2014;5. https://doi.org/10.3389/fphys.2014.00253.

[17] Areas GPT, Mazzuco A, Caruso FR, Jaenisch RB, Cabiddu R, Phillips SA, et al. Flow-mediated dilation and heart failure: a review with implications to physical rehabilitation. Heart Fail Rev 2019;24:69–80. https://doi.org/10.1007/s10741-018-9719-7.

[18] Malliani A, Pagani M, Lombardi F, Cerutti S. Cardiovascular neural regulation explored in the frequency domain. Circulation 1991;84:482–92. https://doi.org/10.1161/01.CIR.84.2.482.

[19] Akselrod S, Gordon D, Ubel FA, Shannon DC, Berger AC, Cohen RJ. Power Spectrum Analysis of Heart Rate Fluctuation: A Quantitative Probe of Beat-to-Beat Cardiovascular Control. Science (1979) 1981;213:220–2. https://doi.org/10.1126/science.6166045.

[20] Electrophysiology TF of the ES of C the NA. Heart Rate Variability. Circulation 1996;93:1043–65. https://doi.org/10.1161/01.CIR.93.5.1043.

[21] Goulart CL, San Martin EA, Mansour KMK, Schneiders PB, Da Silva ALG. Influence of expiratory positive airway pressure on cardiac autonomic modulation at rest and in submaximal exercise in COPD patients. Brazilian Journal of Medical and Biological Research 2018;51:6–13. https://doi.org/10.1590/1414-431X20187180.

[22] Goulart CL, Caruso FR, Arêas GPT, Dossantos PB, Camargo PF, Decarvalho LCS, et al. Impact of chronic obstructive pulmonary disease on linear and nonlinear dynamics of heart rate variability in patients with heart failure. Brazilian Journal of Medical and Biological Research 2020;54:1–9. https://doi.org/10.1590/1414-431X202010084.
